# Supplementary material
Source: HighWire-hosted journal article supplement (http://www.annfammed.org/highwire/filestream/8519/field_highwire_adjunct_files/6/Goldman_Supp_App_2.pdf)
Supplement: Goldman_Supp_App_2.pdf [file Goldman_Supp_App_2.pdf]

**Goldman R, Parker DR, Brown J, Walker J, Eaton CB, Borkan JM. Recommendations for a Mixed Methods Approach for Evaluating the Patient-Centered Medical Home. *Ann Fam Med.* 2015;13(2):.**

## **Supplemental Appendix 2. PCMH Implementation Teamwork Survey**

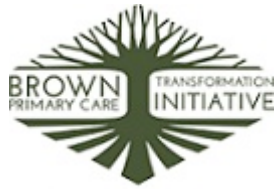

## Brown Primary Care Transformation Initiative PCMH Implementation Survey (Modified Scale)\*

Q1. What is your role in this practice? \_\_\_\_\_ Q2. Today's Date \_\_\_\_ / \_\_\_\_ / \_\_\_\_

| #   | Question                                                                                                                                | Strongly Disagree | Disagree | Neutral | Agree | Strongly Agree |   |   |   |   |    |
|-----|-----------------------------------------------------------------------------------------------------------------------------------------|-------------------|----------|---------|-------|----------------|---|---|---|---|----|
| Q3  | We regularly take time to consider ways to improve how we do things.                                                                    | 1                 | 2        | 3       | 4     | 5              |   |   |   |   |    |
| Q4  | After trying something new, we take time to think about how it worked.                                                                  | 1                 | 2        | 3       | 4     | 5              |   |   |   |   |    |
| Q5  | This practice encourages everyone (front office staff, clinical staff, nurses, and clinicians) to share ideas.                          | 1                 | 2        | 3       | 4     | 5              |   |   |   |   |    |
| Q6  | Practice leadership promotes an environment that is an enjoyable place to work.                                                         | 1                 | 2        | 3       | 4     | 5              |   |   |   |   |    |
| Q7  | Leadership in this practice creates an environment where things can get accomplished.                                                   | 1                 | 2        | 3       | 4     | 5              |   |   |   |   |    |
| Q8  | Leadership strongly supports practice change efforts.                                                                                   | 1                 | 2        | 3       | 4     | 5              |   |   |   |   |    |
| Q9  | The practice leadership makes sure that we have the time and space necessary to discuss changes to improve care.                        | 1                 | 2        | 3       | 4     | 5              |   |   |   |   |    |
| Q10 | When we experience a problem in the practice, we make a serious effort to figure out what's really going on.                            | 1                 | 2        | 3       | 4     | 5              |   |   |   |   |    |
| Q11 | I have many opportunities to grow in my work.                                                                                           | 1                 | 2        | 3       | 4     | 5              |   |   |   |   |    |
| Q12 | Most of the people who work in our practice seem to enjoy their work.                                                                   | 1                 | 2        | 3       | 4     | 5              |   |   |   |   |    |
| Q13 | Mistakes have led to positive changes here.                                                                                             | 1                 | 2        | 3       | 4     | 5              |   |   |   |   |    |
| Q14 | It is hard to get things to change in our practice.                                                                                     | 1                 | 2        | 3       | 4     | 5              |   |   |   |   |    |
| Q15 | This practice learns from its mistakes.                                                                                                 | 1                 | 2        | 3       | 4     | 5              |   |   |   |   |    |
| Q16 | On a scale of 1 to 10 with 1 being the lowest and 10 the highest, how confident are you that this practice can work together to change? | 1                 | 2        | 3       | 4     | 5              | 6 | 7 | 8 | 9 | 10 |

2 | Brown University, Department of Family Medicine, Providence, RI USA, 2014  
Implementation Survey ver. 11-16-2011 \*Based on the NDP Practice Environment Checklist and Adaptive Reserve Survey

➔  
OVER

| #   | Question                                                                                                                        | Strongly Disagree | Disagree | Neutral | Agree | Strongly Agree |
|-----|---------------------------------------------------------------------------------------------------------------------------------|-------------------|----------|---------|-------|----------------|
| Q17 | <b>This practice works effectively together as a team with community organizations.</b>                                         | 1                 | 2        | 3       | 4     | 5              |
| Q18 | <b>People in this practice are connected with community organizations that serve patients.</b>                                  | 1                 | 2        | 3       | 4     | 5              |
| Q19 | <b>This practice works well together with the health care system.</b>                                                           | 1                 | 2        | 3       | 4     | 5              |
| Q20 | <b>People in this practice believe cultural issues are important in their interaction with patients.</b>                        | 1                 | 2        | 3       | 4     | 5              |
| Q21 | <b>People in this practice believe cultural issues are important in their interactions with health professional colleagues.</b> | 1                 | 2        | 3       | 4     | 5              |
| Q22 | <b>People in this practice are comfortable caring for patients from culturally diverse backgrounds.</b>                         | 1                 | 2        | 3       | 4     | 5              |
| Q23 | <b>People in this practice are comfortable working with health care professionals from culturally diverse backgrounds.</b>      | 1                 | 2        | 3       | 4     | 5              |
| Q24 | <b>Staff feel like their mistakes are held against them.</b>                                                                    | 1                 | 2        | 3       | 4     | 5              |
| Q25 | <b>It is just by chance that more serious mistakes don't happen in this practice.</b>                                           | 1                 | 2        | 3       | 4     | 5              |
| Q26 | <b>Patient safety is never sacrificed to get more work done.</b>                                                                | 1                 | 2        | 3       | 4     | 5              |
| Q27 | <b>When things get really busy, people in this practice are expected to work faster, even if it means taking shortcuts.</b>     | 1                 | 2        | 3       | 4     | 5              |
| Q28 | <b>This practice has a clear, expressible vision.</b>                                                                           | 1                 | 2        | 3       | 4     | 5              |
| Q29 | <b>There is a frequent and good communication throughout the practice about how the different change initiatives are going.</b> | 1                 | 2        | 3       | 4     | 5              |
| Q30 | <b>People who work in this practice are respectful of patients.</b>                                                             | 1                 | 2        | 3       | 4     | 5              |
| Q31 | <b>People in this practice believe this practice provides culturally responsive care.</b>                                       | 1                 | 2        | 3       | 4     | 5              |
| Q32 | <b>People in this practice do their best to maintain patient confidentiality at all times.</b>                                  | 1                 | 2        | 3       | 4     | 5              |
